1  
2  
3  
4  
5  
6  
7  
8  
9  
10  
11  
12  
13  
14  
15  
16  
17  
18  
19  
20  
21  
22  
23  
24  
25  
26  
27  
28  
29

## Evaluating pregnant women’s selenium intake through dietary assessment in Accra, Ghana: a feasibility study

Amy Amuquandoh<sup>1\*</sup>¶, Marie Aluko<sup>2</sup>¶, Ebenezer, Ofori-Attah<sup>3</sup>, Godfred Egbi<sup>4</sup>, Kwame Adu-Bonsaffoh<sup>5</sup>¶

<sup>1</sup>University of North Carolina School of Medicine at Chapel Hill, Chapel Hill, NC, USA

<sup>2</sup> Department of Medicine, Korle Bu Teaching Hospital, Accra, Ghana

<sup>3</sup>Clinical Pathology Department, Noguchi Memorial Institute for Medical Research, College of Health Sciences, University of Ghana, P. O. Box LG581, Legon, Ghana.

<sup>4</sup> Nutrition Department, Noguchi Memorial Institute for Medical Research, College of Health Sciences, University of Ghana, P. O. Box LG581, Legon, Ghana.

<sup>6</sup> Department of Obstetrics and Gynecology, Korle Bu Teaching Hospital & University of Ghana Medical School, Accra, Ghana

\*Corresponding author

E-mail: [amy\\_amuquandoh@med.unc.edu](mailto:amy_amuquandoh@med.unc.edu)

¶These authors contributed equally to this work

## 30 Abstract

31 **Objective:** Dietary selenium (Se) deficiency is associated adverse pregnancy outcomes. We sought to  
32 determine the feasibility of: (1) assessing dietary Se consumption via administration of a food frequency  
33 questionnaire (FFQ) to pregnant women attending the antenatal clinic of Korle Bu Teaching Hospital  
34 (KBTH) in Accra, Ghana and (2) quantifying total Se intake.

35 **Methods:** In this prospective observational cohort study, participants were recruited via purposive sampling  
36 and face-to-face data collection was undertaken using structured FFQs. English-speaking pregnant women  
37 who were  $\geq 18$  years old were eligible to participate. Questions of feasibility were assessed and the average  
38 total Se intake in the population was analyzed.

39 **Results:** One hundred study participants met the inclusion criteria out of 117 eligible. It was feasible to  
40 administer the surveys in the clinic waiting room. The average total Se intake in this population of pregnant  
41 women was  $90.4 \mu\text{g}/\text{day} \pm 50.0 \mu\text{g}$ , which is higher than the National Institute of Health recommended  
42 dietary allowance (RDA) of  $60\mu\text{g}/\text{day}$  for pregnant women.

43 **Conclusion:** FFQ assessment of Se consumption and resource evaluation were deemed feasible in the  
44 KBTH setting. Participants reported an average Se intake above the RDA. Future studies can examine the  
45 influence of Se intake on pregnancy outcomes.

46 **Keywords:** Dietary selenium, micronutrients, pregnancy, adverse pregnancy outcomes, food frequency  
47 questionnaires

48

49

50

51

52

53

54

55

56

57

58

59

60

61

62

63

## 64 **Introduction**

65 Pregnant women in low and middle income countries (LMIC) are susceptible to multiple  
66 micronutrient deficiencies as a consequence of globalization and inequitable resource allocation.<sup>1</sup>  
67 Micronutrient deficiencies are capable of exerting a profound and negative effect on maternal  
68 health, fetal development and pregnancy outcomes.<sup>2,3</sup>

69 Selenium (Se) is an essential micronutrient that humans receive predominantly through  
70 diet.<sup>4</sup> Its deficiency is relatively common among pregnant women because of the increased demand  
71 for Se during gestation.<sup>5</sup> In general, maternal nutrition prior to and during pregnancy strongly  
72 influences the risk of pregnancy complications.<sup>5</sup> The recommended dietary allowance (RDA) of  
73 Se for a pregnant woman is 60 µg/day (compared to 55 µg/day for non-pregnant women), and the  
74 tolerable upper level intake is 400 µg/day per the NIH.<sup>6</sup> Over the past few decades, studies have  
75 described the antioxidant role of Se in placental development and in gestational fetal weight gain.  
76<sup>7-10</sup> A deficiency in Se causes altered placental function and low fetal birth weight.

77 Studies show that mean maternal Se concentrations are lower in mothers who have adverse  
78 pregnancy outcomes, as described in various populations irrespective of geographic location.<sup>11-13</sup>  
79 In Nigeria, a case-control study examining the relationship between serum Se deficiency and  
80 preeclampsia demonstrated that about 17.2% of the pregnant population in the control group was  
81 Se deficient.<sup>14</sup> We would expect to observe the same cross-sectional relationship in pregnant  
82 women of Ghana, however, it is not currently known whether this is the case. A 2010 study done  
83 in Ghana demonstrated that serum Se levels for male and female, rural (Brekusu) and urban  
84 (Accra), subjects were within reference ranges, though this effect was not directly studied in the  
85 pregnant population.<sup>15</sup> Furthermore, the process of collecting dietary recall data from pregnant

86 women as a means of exploring this relationship has rarely been studied. Dietary Se  
87 concentrations, while less strongly predictive, is an appropriate proxy for serum Se levels.<sup>16</sup>

88 The goal of this study is to determine the feasibility of collecting dietary Se information,  
89 via a food frequency questionnaire (FFQ), among pregnant women attending the Korle Bu  
90 Teaching Hospital (KBTH) antenatal clinic in Accra, Ghana. We hypothesize that if this approach  
91 is feasible, the survey data we collect should allow us to approximate the average dietary Se intake  
92 in this pregnant population. KBTH is a setting that is likely suited to carry out this study because  
93 it is a teaching hospital, has a high-volume antenatal clinic, and skilled health worker staff. Given  
94 the importance of Se in pregnancy and the limited data in Ghana, the findings of this feasibility  
95 study will not only evaluate the capacity of KBTH to administer dietary surveys to its pregnant  
96 population, but also provide local evidence concerning the burden of Se deficiency in pregnant  
97 women attending KBTH in Accra, Ghana.

## 98 **Methods**

99

### 100 *Study Design & Site*

101 This feasibility study, a prospective observational cohort design, explored the challenges  
102 and opportunities presented by administering dietary recall surveys to pregnant women in Accra,  
103 Ghana. Over a period of 3 days from May 11<sup>th</sup>, to May 13<sup>th</sup>, 2022, a team of research assistants  
104 (RA) administered FFQs to pregnant women at the antenatal clinic of the KBTH in Accra, Ghana.  
105 The antenatal clinic attends to about 150 pregnant women each day. Most pregnant women  
106 presenting to the clinic are referred high risk cases from peripheral hospitals in the Greater Accra  
107 Region and the neighboring regions.<sup>17</sup>

### 108 *Study Population & Selection*

109 Our study population was drawn from pregnant women who attended the KBTH antenatal  
110 clinic. Fluency in English was a requirement to participate in the study as required by the  
111 University of North Carolina IRB. Purposive sampling was used to select participants. All adult  
112 pregnant women  $\geq$  age of 18 attending the clinic were eligible for the study, regardless of health  
113 status or gestational age.

#### 114 *Sample size determination*

115 As this is a feasibility and hypothesis-generating study, a power calculation was not  
116 indicated. We selected a sample size of 100 pregnant women in order to estimate the average Se  
117 intake in this population; we are not able to calculate power since we have no current data from  
118 studies establishing an approximation of Se concentration in pregnant women in Ghana.

#### 119 *Study Procedures*

120 Participants arrived at the clinic and waited to be seen on a first-come-first-serve basis  
121 between the hours of 8:00 a.m-2:00 p.m. We administered a paper version of the REDCap Global  
122 (NC TraCS Institute) FFQ adapted from the one used for the Environment, Perinatal Outcomes,  
123 and Children's Health (EPOCH) study done at UNC (Manuck, PI). We sought to answer questions  
124 such as: "How long does it take to administer a survey? Which faculty are best suited to administer  
125 the survey? How many questionnaires can we administer in one day?" (Supplemental information)  
126 We administered the FFQ captured self-reports of dietary Se intake by asking women to report  
127 which foods, from a list of about 60 food items or prepared dishes they had eaten during the past  
128 month. We then estimated the concentrations of maternal Se intake in  $\mu\text{g}/\text{day}$  and compared them  
129 to the 60  $\mu\text{g}/\text{day}$  RDA for pregnant women.<sup>6</sup> To adapt the FFQ for use in this locale, Ghanaian  
130 foods were substituted as appropriate (Table 1).

131 *Ethics Statement*

132 This study received approval from the UNC Institutional Review Board (IRB) (IRB No.  
133 22-0085). We did not collect biological samples or any other identifying information (in  
134 accordance with the HIPAA “Minimum Necessary Rule”) so the risk to participants was minimal.  
135 The study received KBTH Scientific and Technical Committee approval, and we obtained formal  
136 written consent from the participants.

137 *Dietary Assessment*

138 Through purposive sampling, clinic participants were approached and consented by 3 RAs,  
139 who administered the FFQ in the clinic waiting room with minimal disruptions to the clinic flow  
140 prior to each provider visit.

141 Responses were entered into the REDCap Global survey database as shown in Figure 3  
142 hosted at UNC Chapel Hill.<sup>18,19</sup> Concentrations of dietary Se in each food item of the FFQ were  
143 determined by referencing the standard Se concentration per food unit, determined by the USDA  
144 FoodData Central database.<sup>20</sup> Foods not listed in this database and endemic to Ghana were run as  
145 samples through inductively coupled plasma mass spectrometry (ICP-MS) at the Ghana Standard  
146 Authority (GSA) as shown in Table 1. Briefly, 1.0g of each sample was weighed and digested  
147 using a microwave digester and allowed to cool. The digest was diluted with deionized water. Se  
148 concentrations were determined using ICP-MS. Selenium concentration was calculated using the  
149 formula below;

150

$$151 \quad C = \frac{(C_1 - C_0) * V}{w * 1000}$$

152  
153 where

154  $C_1$  is the concentration in microgram per litre of the samples

155  $C_0$  is the concentration in microgram per litre of the blank sample  
156  $w$  is the weight of the samples taken  
157  $V$  is the volume of the test sample  
158

159 **Table 1.** Se concentration of commonly consumed Ghanaian foods determined by ICP-MS

| Name of Sample                    | Se Concentration (mg/kg) |
|-----------------------------------|--------------------------|
| Kenkey                            | 0.03                     |
| Fufu                              | 0.06                     |
| Yam                               | 0.01                     |
| Goat meat                         | 1.10                     |
| Pork                              | 0.90                     |
| Brown rice                        | 0.05                     |
| Bambara beans                     | 0.07                     |
| Red beans                         | <0.01                    |
| Kontomire leaves                  | 0.08                     |
| Hausa koko (millet)               | 0.12                     |
| Onions                            | 0.02                     |
| Garlic                            | 0.02                     |
| Keta School Boys Fish (anchovies) | 0.91                     |
| Jollof rice                       | 0.05                     |
| Waakye (rice and beans)           | 0.04                     |
| Banana                            | 0.05                     |
| Egg                               | 2.03                     |
| Turkey berries <sup>a</sup>       | 0.87                     |

160 <sup>a</sup> not asked about in the FFQ

### 161 *Analysis techniques*

162 As this was a feasibility study without formal hypothesis testing, the analyses were mainly  
163 descriptive.<sup>21</sup> Most of the literature guiding statistical testing in feasibility studies concurs that  
164 interpretation and reporting of intervention testing must be done with caution due to the probable  
165 small sample size without known power.<sup>21</sup> Total population Se intake analysis was performed  
166 using Stata version 16.0.<sup>22</sup>

### 167 **Results**

168 We approached a total of 117 participants attending the clinic over 3 days. We administered  
169 104 total FFQs with an 88.9% recruitment rate. Thirteen women declined to participate for reasons  
170 including not speaking English or declining to participate; 1 was in labor (Figure 1). Of the 104  
171 FFQs administered, 100 surveys were eligible to be used in the analysis; 2 were missing, 1 survey  
172 was without consent and 1 was missing a page of responses.

173 The median time to complete a single FFQ was 10 minutes, with a range of 7-18 minutes.  
174 This time did not include the time taken to administer the consent form, which also varied between  
175 RAs. We found that this population of 100 pregnant women had above average Se intake (90.4  
176  $\mu\text{g}/\text{day} \pm 50.0 \mu\text{g}$ ).

177 We found that it was feasible to administer FFQs in the KBTH maternal outpatient waiting  
178 room. However, considering the issues of confidentiality when administering the surveys in an  
179 open setting, it would be more feasible and appropriate to administer the surveys in a setting with  
180 a fixed schedule and within available consulting rooms in which RAs may present the survey to  
181 participants while they await their clinician visit.

## 182 **Discussion**

### 183 *On Recruiting English-Speaking Participants*

184 Though English is the national language of Ghana and is taught in primary school  
185 education, Akan is most widely spoken with English as the second language. It is important to  
186 state the role of the nurse midwives. At the beginning of each day of data collection, the nurse  
187 midwives emphasized the importance of speaking “*brofo*”, or “White man’s language”, in Akan,  
188 during their daily announcement to the participants. Recruiting English speaking participants in



189 this setting, as a result, was more feasible than we had expected as we reached our maximum study  
190 participant goal.

191 The research team could easily distinguish between participants who had arrived later on  
192 in the day and had not heard the midwives' announcement – this group of pregnant women was  
193 more likely to decline participation in the study. We mitigated this by requesting the nurse  
194 midwives to repeat the announcement halfway through the day, when most of the initial  
195 participants had left.

#### 196 *On Survey Interpretation and Understanding*

197 The team had post-collection discussions to assess comprehensibility and then identify and  
198 address survey issues. For example, we noticed that participants were more familiar with “black-  
199 eyed peas” and “Bambara beans” than both “red beans” and “kidney beans”; the latter were listed  
200 first.<sup>23,24</sup> If an RA asked about the less familiar beans first, the general sense was that the  
201 respondent was less likely to report that she consumed beans. However, *waakye*, a staple rice and  
202 beans dish in the Ghanaian diet, contains black-eyed peas. Presumably, women would be  
203 underreporting their intake of beans overall if they did not hear the more commonly consumed  
204 “black eyed peas” listed first. Alternatively, this may lead to double counting.<sup>23</sup> Gerdessen and  
205 colleagues optimized the selection of foods for the questionnaire by way of modeling and utilizing  
206 a software program to reduce this issue among other errors inherent to FFQ use.<sup>25</sup> We modified  
207 the survey each day to respond to issues like this and refined our survey so that there were no more  
208 perceivable corrections to make.

209 The research team could easily distinguish between patients who had arrived later on in the  
210 day and had not heard the midwives' announcement – this group of pregnant women was more

211 likely to decline participation in the study. We mitigated this by requesting the nurse midwives to  
212 repeat the announcement halfway through the day, when most of the initial patients had left.

213

#### 214 *Optimal Faculty for FFQ Administration*

215 We found that it was feasible to recruit 6 RAs to administer the FFQ, rotating 2 RAs over  
216 the 3 day period, including the PI. As the PI was an “outsider” to the culture, despite the fact that  
217 she spoke English, we aimed to primarily use research assistants to carry out the research in order  
218 to reduce the gaps in responses and cultural understanding.<sup>26</sup> Stevano and Deane (2017) highlight  
219 some of these gaps as a limited ability to verify the accuracy of the information collected,  
220 respondents’ uneasiness to speak to an outsider, etc.

221 . Our approach of rotating our RAs over each day of data collection introduced the risk of  
222 inconsistencies in the nuances of data collection, despite standardized training. We recommend a  
223 more reliable and cost-effective method—delegate 2 or 3 RAs at the beginning of the data  
224 collection to administer all surveys over the collection period.

#### 225 *Average FFQ Administration Time*

226 In the context of the waiting room, the average time to administer the 66-item survey was  
227 10 minutes (CI 95%: [9.7, 10.3 minutes]), excluding time to obtain consent. The average time to  
228 administer a survey depends on its item number, various studies show. As expected there is a direct  
229 correlation between the item number and average time (e.g 14 mins for a 146-item survey).<sup>27</sup>  
230 Initially, we anticipated taking greater than 30 minutes per survey to set up the clinic room before  
231 and after each participant encounter and then administer the consent and survey. However the  
232 process of administering the FFQ in the waiting room quickened the process. Time taken to obtain

233 consent should be considered, however, as the total time spent with a participant may influence  
234 recruitment and engagement.

#### 235 *On Number of Surveys Per Day*

236 The number of FFQs administered depended on the clinic volume of the day amongst other  
237 variables.<sup>24</sup> We reassessed the initial 5-day data collection period and determined that it was  
238 feasible to administer 100 surveys over a period of 3 days. We administered 26, 44, and 34 surveys  
239 on the first, second and third days, respectively.

#### 240 *On Data Management*

241 All 104 paper surveys and informed consent forms were scanned by phone (Adobe Scan)  
242 and saved to a secure online folder. Data from all 104 surveys were then manually entered into  
243 the REDCap database. It is feasible to use pen and paper in this setting, but we recommend using  
244 multiple digital tablets, which could simultaneously record and enter data directly into REDCap  
245 or other data collection instruments. Though this study was limited in its financial capacity to  
246 procure a handful (2-3) of new study-tablets, the KBTH setting would not prohibit the effective  
247 use of such technology as there is secure WiFi and hotspot availability.

#### 248 *On Data Analysis and Coding*

249 We found that data analysis for our original purposes of determining the average level of  
250 Se content in the KBTH population of pregnant women was feasible. The above average Se intake  
251 in this population (90.4 µg/day ±50.0 µg) predicts that the rates of documented adverse pregnancy  
252 outcomes would be low in this population. Nevertheless, Thompson & Subar (2013), suggest that  
253 the error inherent in the FFQ approach renders analysis to approximate quantitative parameters  
254 inappropriate; it should be regarded as an estimation if at all. <sup>23</sup>

255 *On Appropriate Population-Specific Measures*

256 FFQs primarily include the foods that have high levels of the nutrient of focus and foods  
257 that are specific to the context in which they are being administered.<sup>28</sup> Future studies in the same  
258 setting should include foods like oysters and other seafood, which are both known to be high in Se  
259 and which pregnant women in Ghana tend to eat in moderation. Consuming snails, however, has  
260 long been associated with the taboo of birthing a child who drools excessively.<sup>29</sup>

261 We recommend creating a dietary survey incorporating the input of women in the  
262 community, as this would have not only been helpful but also extraordinarily valuable to the  
263 adaptation or validation of the FFQ. During survey administration, researchers will likely gather  
264 some information about cultural beliefs and perceptions of food, like the one mentioned above,  
265 but formalizing the process through a focus group would serve the research well.

266 *Strengths and Limitations*

267 The main strength of our study relates to its prospective design which enabled direct data  
268 collection and hence minimal recall bias. In addition, this was a feasibility study being the first of  
269 its kind in the country. Every limitation presents as a point of edification for a future study design.  
270 We made the decision to not collect any protected health information (PHI) in order to maintain  
271 confidentiality and adhere to the “Minimum Necessary Rule” of HIPAA.<sup>30</sup> PHI was not necessary  
272 for the purposes of this study that simply assessed feasibility. If PHI had been collected, we would  
273 recommend that the results of statistical analysis and intervention testing be interpreted with  
274 caution as a power calculation to support the results is not typical of a feasibility study.

275 Confidentiality remained a limitation of this study as we administered surveys in the  
276 waiting room as women arrived for their visits. Though confidentiality may have been

277 compromised in such a setting, we mitigated the risk by not collecting any identifying information  
278 in the surveys. Nevertheless, to ensure complete confidentiality in a future study, we recommend  
279 collaborating with hospital management and clinicians to use a private clinic room before or after  
280 the visit is finished.

## 281 **Conclusion**

282 Administration of the Se-focused FFQ to Ghanaian pregnant women attending the  
283 antenatal clinic at KBTH is feasible. Data collection ran with minimal to no disruption of the clinic  
284 flow. In this setting, where the waiting time was primarily done outside of the clinic room, we had  
285 to sacrifice a level of confidentiality that was significantly mitigated by our decision not to collect  
286 any identifying information, including demographic information, as enforced by the Minimum  
287 Necessary Rule of the IRB. Future studies would do well to incorporate survey validation as well  
288 as a context-specific and micronutrient-focused FFQ for effective data analysis. Done effectively,  
289 FFQ administration to populations of pregnant women in resource-limited settings, like the one in  
290 this study, can improve context-specific prenatal nutritional counseling about Se and, ultimately,  
291 improve pregnancy outcomes.

292

293 **Author contributions:** AA designed, planned, and conducted the study, completed the data  
294 analysis and authored the manuscript. GE and EOA contributed to the design, planning of the study  
295 and manuscript writing. MA contributed to the planning and conduct of the study, and then  
296 manuscript writing. KAB supervised the design, planning and conduct of the study and contributed  
297 to the manuscript writing.

298 **Funding:** None.

299 **Conflict of interest:** The authors have no conflicts of interest.

300 **Acknowledgements:** We would like to thank Dr. Tracy Manuck for her support and guidance of  
301 this study, which we modeled after her previous work. We would like to thank UNC Gillings  
302 School of Public Health for its enablement and support of this project. Lastly, we thank the staff  
303 of the KBTH Obstetrics and Gynecology department and the National Service research assistants  
304 at NMIMR who were integral in carrying out this study.

## 305 **References**

- 306 1. Darnton-Hill I, Mkpuru UC. Micronutrients in pregnancy in low- and middle-income countries. *Nutrients*  
307 2015; 7: 1744–1768.
- 308 2. Stoffaneller R, Morse NL. A review of dietary selenium intake and selenium status in Europe and the  
309 Middle East. *Nutrients* 2015; 7: 1494–1537.
- 310 3. Wilson RL, Bianco-Miotto T, Leemaqz SY, et al. Early pregnancy maternal trace mineral status and the  
311 association with adverse pregnancy outcome in a cohort of Australian women. *J Trace Elem Med Biol* 2018;  
312 46: 103–109.
- 313 4. Zachariah R, Harries AD, Manzi M, et al. Acceptance of anti-retroviral therapy among patients infected with  
314 HIV and tuberculosis in rural Malawi is low and associated with cost of transport. *PLoS One*; 1. Epub ahead  
315 of print 2006. DOI: 10.1371/journal.pone.0000121.
- 316 5. Hofstee P, Bartho LA, McKeating DR, et al. Maternal selenium deficiency during pregnancy in mice  
317 increases thyroid hormone concentrations, alters placental function and reduces fetal growth. *J Physiol*  
318 2019; 597: 5597–5617.
- 319 6. U.S. Department of Health and Human Services. Selenium Fact Sheet for Health Professionals. *NIH Office*  
320 *of Dietary Supplements*, <https://ods.od.nih.gov/factsheets/Selenium-HealthProfessional/#h2> (2021).
- 321 7. Hofstee P, Cuffe JSM, Perkins A V. Analysis of selenoprotein expression in response to dietary selenium  
322 deficiency during pregnancy indicates tissue specific differential expression in mothers and sex specific  
323 changes in the fetus and offspring. *Int J Mol Sci* 2020; 21: 1–19.
- 324 8. Lewandowska M, Sajdak S, Lubiński J. The role of early pregnancy maternal selenium levels on the risk for  
325 small-for-gestational age newborns. *Nutrients*; 11. Epub ahead of print 2019. DOI: 10.3390/nu11102298.
- 326 9. Perkins A V., Vanderlelie JJ. Multiple micronutrient supplementation and birth outcomes: The potential  
327 importance of selenium. *Placenta* 2016; 48: 61–65.
- 328 10. Guo X, Zhou L, Xu J, et al. Prenatal Maternal Low Selenium, High Thyrotropin, and Low Birth Weights.  
329 *Biol Trace Elem Res* 2021; 199: 18–25.
- 330 11. Lewandowska M, Lubiński J. Serum microelements in early pregnancy and their risk of large-for-gestational  
331 age birth weight. *Nutrients* 2020; 12: 1–16.
- 332 12. Sjöström L, Peltonen M, Jacobson P, et al. Bariatric surgery and long-term cardiovascular events. *JAMA - J*  
333 *Am Med Assoc* 2012; 307: 56–65.
- 334 13. Laar A., Ampofo W., Tuakli J, et al. Factors associated with suboptimal intake of some important nutrients

- 335 among HIV-positive pregnant adolescents from two Ghanaian districts. *J Ghana Sci Assoc*; 11. Epub ahead  
336 of print 2010. DOI: 10.4314/jgsa.v11i2.50930.
- 337 14. Eze SC, Ododo NA, Ugwu EO, et al. Serum selenium levels of pre-eclamptic and normal pregnant women  
338 in Nigeria: A comparative study. *PLoS One* 2020; 15: 1–13.
- 339 15. Asare GA, Nani A. Serum levels of Cu, Se, and Zn in adult rural/urban residents in Ghana: Paradigm shift?  
340 *Biol Trace Elem Res* 2010; 137: 139–149.
- 341 16. Holmquist E, Brantsæter AL, Meltzer HM, et al. Maternal selenium intake and selenium status during  
342 pregnancy in relation to preeclampsia and pregnancy-induced hypertension in a large Norwegian Pregnancy  
343 Cohort Study. *Sci Total Environ* 2021; 798: 149271.
- 344 17. KBTH.gov. Obstetrics & Gynaecology Department – Korle-Bu Teaching Hospital,  
345 <https://kbth.gov.gh/departments-centres/obstetrics-gynaecology-department-2/> (accessed 2 April 2022).
- 346 18. Harris P, Taylor R, Minor B, et al. EDCap Consortium, The REDCap consortium: Building an international  
347 community of software partners. *J Biomed Inform.* Epub ahead of print 2019. DOI: doi:  
348 10.1016/j.jbi.2019.103208].
- 349 19. Harris P, Taylor R, Thielke R, et al. Research electronic data capture (REDCap) – A metadata-driven  
350 methodology and workflow process for providing translational research informatics support. *J Biomed Inf*  
351 2009; 42: 377–81.
- 352 20. Usda.gov. U.S Department of Agriculture Food Data Central. *n.d.*, <https://fdc.nal.usda.gov/>.
- 353 21. Arain M, Campbell MJ, Cooper CL, et al. What is a pilot or feasibility study? A review of current practice  
354 and editorial policy. *BMC Med Res Methodol* 2010; 10: 1–7.
- 355 22. StataCorp. Stata Statistical Software: Release 16.
- 356 23. Thompson FE, Subar AF. *Dietary assessment methodology*. 2013. Epub ahead of print 2013. DOI:  
357 10.1016/B978-0-12-802928-2.00001-1.
- 358 24. Molag ML, De Vries JHM, Ocké MC, et al. Design characteristics of food frequency questionnaires in  
359 relation to their validity. *Am J Epidemiol* 2007; 166: 1468–1478.
- 360 25. Gerdessen JC, Souverein OW, Van 'T Veer P, et al. Optimising the selection of food items for FFQs using  
361 Mixed Integer Linear Programming. *Public Health Nutr* 2015; 18: 68–74.
- 362 26. Stevano S, Deane K. The role of research assistants in qualitative and cross-cultural social science research.  
363 *Handb Res Methods Heal Soc Sci* 2019; 1675–1690.
- 364 27. Franco RZ, Alawadhi B, Fallaize R, et al. A Web-based graphical food frequency assessment system:  
365 Design, development and usability metrics. *JMIR Hum Factors*; 4. Epub ahead of print 2017. DOI:  
366 10.2196/humanfactors.7287.
- 367 28. Shim J-S, Oh K, Kim HC. Dietary assessment methods in epidemiologic studies. *Epidemiol Health* 2014;  
368 e2014009.
- 369 29. Senah K. MATERNAL MORTALITY IN GHANA : THE OTHER SIDE 1 Kodjo Senah Abstract.  
370 *Mortality* 2003; 1: 47–55.
- 371 30. HHS Office for Civil Rights. OCR HIPAA Privacy MINIMUM NECESSARY [45 CFR 164.502(b),  
372 164.514(d)]. *Heal Inf Priv* 2003; 502: 2002–2004.

373

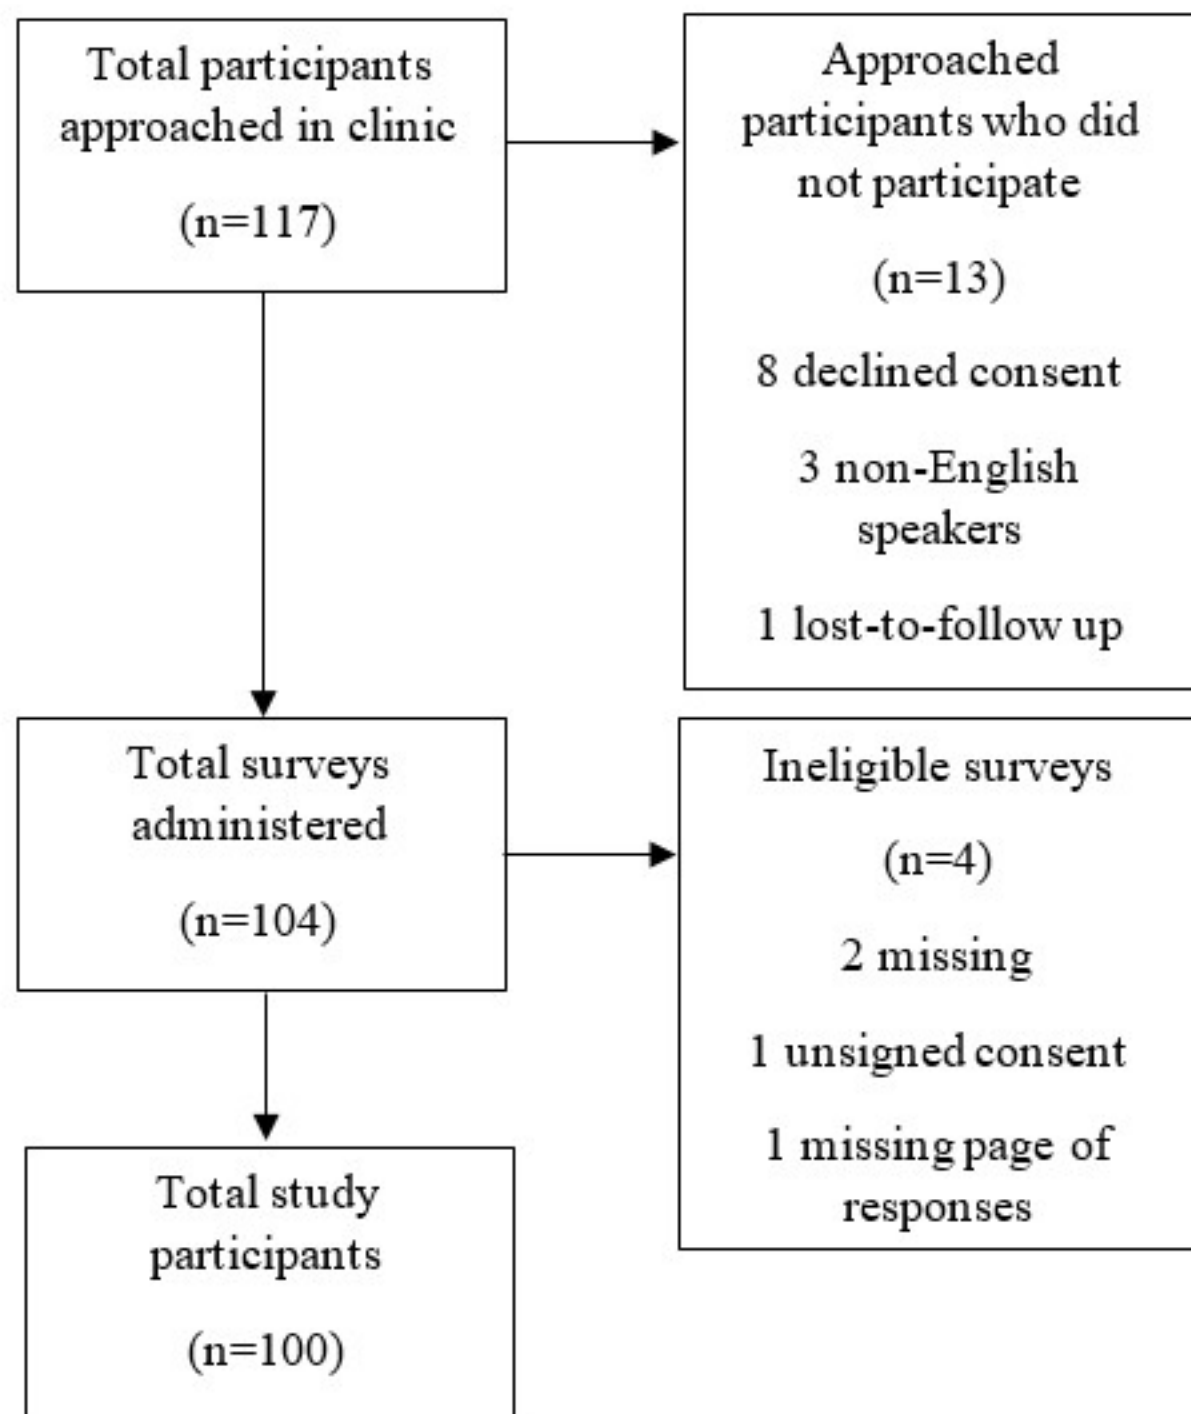

**Figure 1.** Feasibility study selection CONSORT flow chart
